# Supplementary material
Source: PubMed Central journal article supplement (PMC2532856)
Supplement: NIHMS60844-supplement-si20050930_123.pdf [file NIHMS60844-supplement-si20050930_123.pdf]

**A**

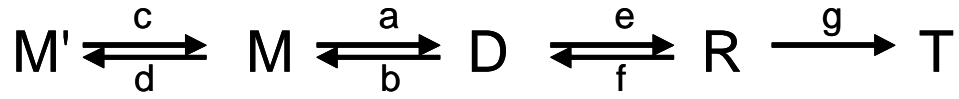

| SSQ   | a    | b    | c    | d    | e    | f       | g      |
|-------|------|------|------|------|------|---------|--------|
| 0.072 | 1.26 | 47.4 | 16.7 | 1.01 | 1.10 | 0.00562 | 0.0834 |

**B**

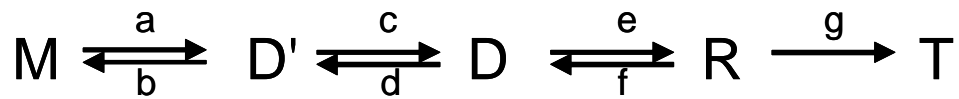

| SSQ   | a      | b      | c    | d   | e  | f     | g     |
|-------|--------|--------|------|-----|----|-------|-------|
| 0.063 | 0.0466 | 0.0225 | 1.66 | 178 | 31 | 0.120 | 0.164 |

**C**

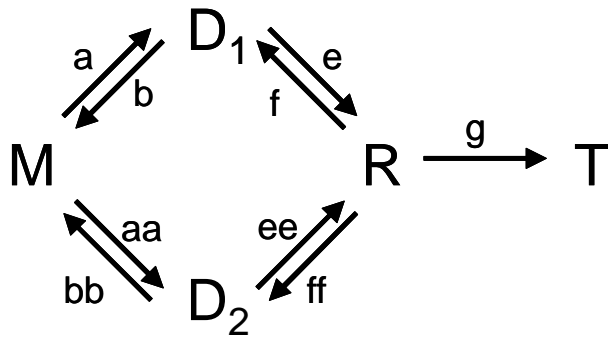

| SSQ    | a       | b   | aa   | bb   | e      | f       | ee    | ff     | g     |
|--------|---------|-----|------|------|--------|---------|-------|--------|-------|
| 0.0766 | 4.11e-6 | 566 | 0.30 | 10.3 | 0.0067 | 1.02e-8 | 0.922 | 0.0061 | 0.078 |

## Supplemental Figure Legends

Figure S1. Best fit results for variations of the Mechanism E reassembly pathway demonstrates that including first-order conformational changes or an alternative dimerization pathway do not significantly improve the fit of Mechanism E. (A) Best fit of the concentration dependent TTR reassembly to a variation of the Mechanism E reassembly pathway with a conformational change in the monomer prior to dimerization ( $M'MDRT$ ). The table indicates the sum of squared differences (SSQ) and the best fit rate constants with the units of  $\mu M^{-1} sec^{-1}$  for all bimolecular processes and with the units of  $sec^{-1}$  for all first-order rate processes. The slight improvement in the SSQ for this model is a result of the increased number of parameters. (B) Best fit results of the concentration dependent TTR reassembly to a variant of Mechanism E with a conformational change after dimerization ( $MD'DRT$ ). The table indicates the sum of squared differences (SSQ) and the best fit rate constants with the units of  $\mu M^{-1} sec^{-1}$  for all bimolecular processes and with the units of  $sec^{-1}$  for all first-order rate processes. As above, the slight improvement in the SSQ for this model is a result of the increased number of parameters. Fitting to a variant of the Mechanism E pathway with a conformational change in the trimer ( $MDR'RT$ ) or the tetramer ( $MDRT'T$ ) did not improve the SSQ value as compared to Mechanism E. (C) Fitting analysis of the concentration dependent TTR reassembly to a variation of the Mechanism E pathway with a second dimerization pathway ( $MD_1D_2RT$ ). The table indicates the sum of squares value (SSQ) and the fitted rate constants with the units of  $\mu M^{-1} sec^{-1}$  for all bimolecular processes and with the units of  $sec^{-1}$  for all first-order rate processes.
